# Supplementary material
Source: publisher figshare collection journal article supplement (https://tandf.figshare.com/articles/dataset/_/7504715)

### Supplementary File 1

**A real example of cross shaped co-expression pattern.** The gene expression data of this example (i.e. GDS4336 dataset) is from pancreatic ductal adenocarcinoma tumor tissues and adjacent non-tumor.

As it is indicated, expression levels of genes *C5* and *Elmo1* are positively correlated ( $r_1 = 0.29$ ) in tumor samples (orang), while there is an inverse correlation ( $r_2 = -0.91$ ) between *C5* and *Elmo1* expression levels in non-tumor samples (blue).

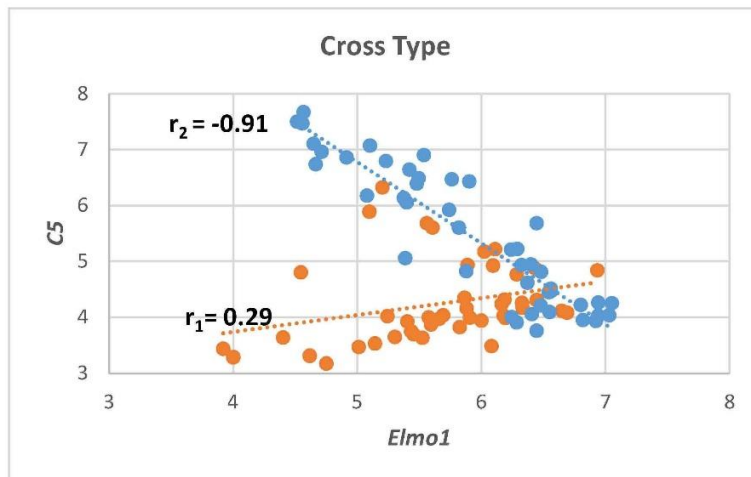

Supplement: Supplementary file 1 [file 1 › SF 1.pdf]
